# Supplementary material for: Integrated microbiome and metabolomic analyses revealed the antifibrotic effect of vanillic acid on thioacetamide-induced liver fibrosis in mice
Source: Royal Society of Chemistry journal article supplement (doi:10.1039/d4fo02309a), 2024-01-01
Supplement: d4fo02309a1.pdf [file d4fo02309a1.pdf]

Supplement data files

Figure S1 Changes in body weight during the experimental intervention period (n=7)

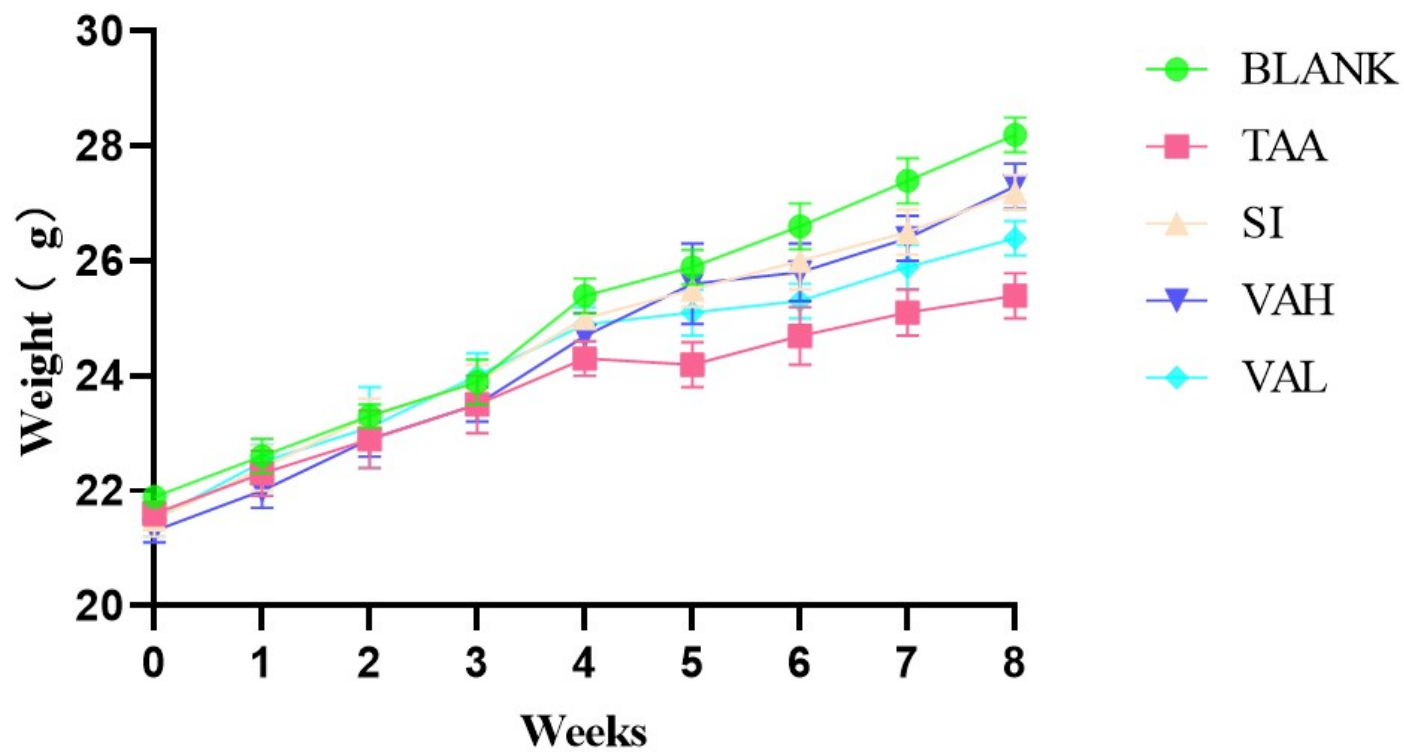

Table S1 The abundance of all significantly altered gut microbiota at the phylum, family, and genus levels (mean)

| Name                               | BLANK       | TAA         | SI          | VAH         | VAL         |
|------------------------------------|-------------|-------------|-------------|-------------|-------------|
| p_Actinobacteria                   | 0.001823985 | 0.003053193 | 0.008756452 | 0.002174243 | 0.004057707 |
| p_Verrucomicrobia                  | 0.000125564 | 0.138358545 | 0.01003192  | 0.045645896 | 0.028119775 |
| p_TM7                              | 7.26951E-05 | 0.002663283 | 0.004394747 | 0.001777725 | 0.004302226 |
| p_Proteobacteria                   | 0.045355115 | 0.032032092 | 0.018913936 | 0.014175539 | 0.013111547 |
| f_S24-7                            | 0.502177548 | 0.337661994 | 0.354553685 | 0.348255649 | 0.427499884 |
| f_Lachnospiraceae                  | 0.080559356 | 0.120039388 | 0.101548405 | 0.14792786  | 0.131485557 |
| f_unclassified_Clostridiales       | 0.076818864 | 0.028668292 | 0.084372542 | 0.185167562 | 0.054369304 |
| f_Lactobacillaceae                 | 0.037067877 | 0.014757099 | 0.021920868 | 0.005234045 | 0.007930371 |
| f_Deffribacteraceae                | 0.019264194 | 0.001110252 | 0.000165216 | 0.001182947 | 0.001189556 |
| f_Turicibacteraceae                | 6.60864E-05 | 0.014188756 | 0.005293523 | 0.000158607 | 0.001698421 |
| f_Porphryomonadaceae               | 0.003694231 | 0.006258385 | 0.004500486 | 0.001638943 | 0.003198583 |
| f_unidentified_YS2                 | 0.00092521  | 0.005709867 | 0.002702935 | 0.002702935 | 0.002623631 |
| f_Leuconostocaceae                 | 0.004044489 | 1.32173E-05 | 0.001817377 | 0           | 0           |
| f_Peptostreptococcaceae            | 0.00024452  | 0.000964862 | 0.003178757 | 0.000403127 | 0.000548517 |
| f_mitochondria                     | 0.001790942 | 0           | 0.000726951 | 0           | 3.30432E-05 |
| f_Christensenellaceae              | 0.000277563 | 0.000165216 | 9.2521E-05  | 0.000118956 | 0.000138781 |
| f_unclassified_Burkholderiales     | 0.000337041 | 3.30432E-05 | 7.26951E-05 | 0.000105738 | 0           |
| f_unidentified_Alphaproteobacteria | 1.98259E-05 | 0.00024452  | 6.60864E-05 | 8.59124E-05 | 0.000112347 |
| f_RF16                             | 3.30432E-05 | 0.000105738 | 8.59124E-05 | 6.60864E-05 | 0           |
| f_Micrococcaceae                   | 6.60864E-06 | 2.64346E-05 | 0           | 9.2521E-05  | 5.28691E-05 |
| f_Verrucomicrobiaceae              | 0.000125564 | 0.138358545 | 0.01003192  | 0.045645896 | 0.028119775 |
| f_Anaeroplasmataceae               | 0.008412802 | 3.30432E-05 | 0.001989201 | 7.26951E-05 | 0.002127983 |
| f_Enterobacteriaceae               | 0.001262251 | 5.28691E-05 | 0.000806254 | 0.000132173 | 0.000132173 |

|                                    |             |             |             |             |             |
|------------------------------------|-------------|-------------|-------------|-------------|-------------|
| f_Turicibacteraceae                | 6.60864E-05 | 0.014188756 | 0.005293523 | 0.000158607 | 0.001698421 |
| g_Akkermansia                      | 0.000125564 | 0.138318893 | 0.01003192  | 0.045645896 | 0.028119775 |
| g_Turicibacter                     | 6.60864E-05 | 0.014188756 | 0.005293523 | 0.000158607 | 0.001698421 |
| g_Lactobacillus                    | 0.036539186 | 0.01470423  | 0.021742435 | 0.005187785 | 0.007890719 |
| g_unidentified_S24-7               | 0.502177548 | 0.337661994 | 0.354553685 | 0.348255649 | 0.427499884 |
| g_unidentified_Clostridiales       | 0.092157524 | 0.069998744 | 0.085753749 | 0.124658829 | 0.106835319 |
| g_unidentified_Bacteroidales       | 0.00082608  | 0.002194069 | 0.018570286 | 0.006271602 | 0.001857029 |
| g_unclassified_Bacteroidales       | 0.001546422 | 0.006410383 | 0.00516135  | 0.00491683  | 0.004077533 |
| g_unclassified_Helicobacteraceae   | 0.01348824  | 0.000627821 | 0.00209494  | 0.003912317 | 0.001863637 |
| g_Bifidobacterium                  | 0.000178433 | 0.002623631 | 0.007514027 | 0.001546422 | 0.003073019 |
| g_Flexispira                       | 0.006112995 | 0.002550936 | 0.001110252 | 0.000766603 | 0.000997905 |
| g_unidentified_Bacteria            | 0.000819472 | 0.002015636 | 0.000951645 | 0.00102434  | 0.001110252 |
| g_Dehalobacterium                  | 0.000528691 | 0.000720342 | 0.001090426 | 0.002213895 | 0.001103643 |
| g_AF12                             | 0.001790942 | 0.001275468 | 0.000905384 | 0.000667473 | 0.000793037 |
| g_unidentified_Streptophyta        | 0.002617023 | 0           | 0.001189556 | 0.000125564 | 0.000264346 |
| g_Paraprevotella                   | 0           | 0.000806254 | 0.001420858 | 0.001163121 | 0.000317215 |
| g_Roseburia                        | 3.30432E-05 | 0.001394424 | 0.000627821 | 0.000601386 | 0.000574952 |
| g_unidentified_Coriobacteriaceae   | 3.30432E-05 | 0.000112347 | 0.000641038 | 0.000376693 | 0.000376693 |
| g_Anacrotruncus                    | 0.000343649 | 0           | 0.000151999 | 0.000403127 | 7.93037E-05 |
| g_unclassified_Lactobacillales     | 0.000323823 | 9.91296E-05 | 0.000270954 | 6.60864E-06 | 0.000138781 |
| g_unclassified_Lactobacillaceae    | 0.000515474 | 3.96519E-05 | 0.000171825 | 4.62605E-05 | 1.98259E-05 |
| g_Burkholderia                     | 0.000138781 | 0.000396519 | 5.28691E-05 | 3.96519E-05 | 3.96519E-05 |
| g_unclassified_Erysipelotrichaceae | 4.62605E-05 | 0.000185042 | 0.000132173 | 1.32173E-05 | 2.64346E-05 |
| g_unclassified_Bradyrhizobiaceae   | 0           | 0.000231302 | 3.96519E-05 | 0           | 0           |
| g_Comamonas                        | 0.000204868 | 0           | 0           | 0           | 2.64346E-05 |
| g_Rhodococcus                      | 0.000185042 | 0           | 0           | 0           | 0           |

Table S2 The metabolites significantly up-or down-regulated in BLANK vs TAA (mean)

| Name                             | BLANK       | TAA         | P. value    | VIP         | Trend |
|----------------------------------|-------------|-------------|-------------|-------------|-------|
| Dimethylglycine                  | 96307873.61 | 69569613.33 | 0.004329004 | 1.565859637 | ↑     |
| gamma-Aminobutyric acid          | 25014713.47 | 6635177.77  | 0.004329004 | 1.464493527 | ↑     |
| Benzaldehyde                     | 36907195.55 | 43846690.03 | 0.025974026 | 1.233907008 | ↓     |
| 2-Aminophenol                    | 107212148.7 | 60221950.24 | 0.008658009 | 1.490194336 | ↑     |
| Pyrrole-2-carboxylic acid        | 111102690.1 | 142581477.2 | 0.002164502 | 1.427382358 | ↓     |
| 2-Methylserine                   | 40322331.25 | 57427425.89 | 0.025974026 | 1.231335051 | ↓     |
| 4-Hydroxybenzaldehyde            | 138473218.2 | 38626449.35 | 0.004329004 | 1.663295916 | ↑     |
| 1,1-Dimethylbiguanide            | 32947536.64 | 39576021.94 | 0.041125541 | 1.140969867 | ↓     |
| gamma-Amino-gamma-cyanobutanoate | 31876943.08 | 73807618.61 | 0.041125541 | 1.361820169 | ↓     |
| Pipecolic acid                   | 778640331.8 | 1803344524  | 0.041125541 | 1.33185724  | ↓     |
| 5-Amino-2-oxopentanoic acid      | 43259797.81 | 88038538.19 | 0.004329004 | 1.525777884 | ↓     |
| L-Leucine                        | 20149444.86 | 28559827.38 | 0.004329004 | 1.681518594 | ↓     |
| Dopamine                         | 210089456.4 | 380833783.8 | 0.041125541 | 1.148949324 | ↓     |
| N-Acetylarylamine                | 16790497.86 | 10682982.43 | 0.004329004 | 1.624829282 | ↑     |
| 1-Hydroxymethylnaphthalene       | 18525960.52 | 202709506.1 | 0.004329004 | 1.66515668  | ↓     |
| Phosphonoacetate                 | 37166817.17 | 70187689.44 | 0.041125541 | 1.518062167 | ↓     |
| (2R,5S)-2,5-Diaminohexanoate     | 16426000.24 | 13059911.65 | 0.041125541 | 1.248553019 | ↑     |
| 8-Hydroxyquinoline               | 97930819.69 | 311717432.3 | 0.004329004 | 1.376132931 | ↓     |

| Name                                   | BLANK       | TAA         | P. value    | VIP         | Trend |
|----------------------------------------|-------------|-------------|-------------|-------------|-------|
| Pulegone                               | 18696572.61 | 10427393.82 | 0.008658009 | 1.460499591 | ↑     |
| 2',4'-<br>Dihydroxyacetophenone        | 18987228.21 | 10969302.42 | 0.041125541 | 1.060217813 | ↑     |
| Tryptamine                             | 4523746.67  | 1329248.08  | 0.004329004 | 1.696609302 | ↑     |
| L-Rhamnono-1,4-lactone                 | 22037143.03 | 12620908.45 | 0.002164502 | 1.663241771 | ↑     |
| L-Carnitine                            | 2833989746  | 6528207137  | 0.015151515 | 1.35224809  | ↓     |
| 3,4'-<br>Dihydroxyphenylpropanoate     | 674127388.5 | 1082424522  | 0.002164502 | 1.702708191 | ↓     |
| L-beta-Phenylalanine                   | 52023018.78 | 35363988.25 | 0.008658009 | 1.582126324 | ↑     |
| D-syneprine                            | 126703331.5 | 90645817.56 | 0.008658009 | 1.61897545  | ↑     |
| (S)-4-Hydroxymandelate                 | 44621122.52 | 88325917.71 | 0.041125541 | 1.265325764 | ↓     |
| (2S,5S)-trans-<br>Carboxymethylproline | 99131750.98 | 15626952.18 | 0.004329004 | 1.463971609 | ↑     |
| Formiminoglutamic acid                 | 84754704.8  | 43078813.55 | 0.008658009 | 1.309653361 | ↑     |
| N-Formyl-L-glutamic acid               | 50976770.15 | 19691972.18 | 0.025974026 | 1.30572381  | ↑     |
| 2-Hydroxy-3-oxoadipate                 | 26974297.8  | 21948699.81 | 0.002164502 | 1.617600344 | ↑     |
| D-Alanyl-D-serine                      | 3234401.26  | 12099784    | 0.041125541 | 1.216254931 | ↓     |
| N-Formyl-L-methionine                  | 64616260.83 | 28682869.2  | 0.025974026 | 1.033392188 | ↑     |
| Cysteinylglycine                       | 17949232.95 | 7368951.88  | 0.041125541 | 1.183277553 | ↑     |
| Methyleugenol                          | 59592451.24 | 168342569.2 | 0.004329004 | 1.58944772  | ↓     |
| Acetylcholine chloride                 | 6173691.92  | 18083948.14 | 0.025974026 | 1.239514146 | ↓     |
| Dulcin                                 | 1314712.95  | 4317171.46  | 0.041125541 | 1.109184439 | ↓     |
| (S)-beta-Tyrosine                      | 5686826753  | 1847322815  | 0.041125541 | 1.326578395 | ↑     |
| Epinephrine                            | 4540787.97  | 3004888.48  | 0.015151515 | 1.410737085 | ↑     |

| Name                                 | BLANK       | TAA         | P. value    | VIP         | Trend |
|--------------------------------------|-------------|-------------|-------------|-------------|-------|
| Phosphorylcholine                    | 1336845876  | 4248831523  | 0.004329004 | 1.599349063 | ↓     |
| 5-Guanidino-3-methyl-2-oxopentanoate | 145400661.3 | 52401901.38 | 0.008658009 | 1.605483955 | ↑     |
| Isocitric acid                       | 116217879.3 | 81408123.98 | 0.015151515 | 1.459583769 | ↑     |
| L-Dopa                               | 2156176.08  | 3263046.69  | 0.041125541 | 1.064271281 | ↓     |
| N5-(L-1-Carboxyethyl)-L-ornithine    | 21512062.6  | 14424407.08 | 0.004329004 | 1.572349972 | ↑     |
| Indolelactic acid                    | 7094626.61  | 12225201.73 | 0.025974026 | 1.17538134  | ↓     |
| Dethiobiotin                         | 6301852.39  | 25428591.53 | 0.025974026 | 1.463596759 | ↓     |
| beta-Alanyl-L-lysine                 | 95091657.37 | 43780899.59 | 0.015151515 | 1.254501792 | ↑     |
| Propionylcarnitine                   | 71870245.79 | 19067853.14 | 0.008658009 | 1.448376228 | ↑     |
| gamma-Glutamylalanine                | 25729366.92 | 37368304.67 | 0.002164502 | 1.714156757 | ↓     |
| Capsidiol                            | 8111240.59  | 1851895.36  | 0.002164502 | 1.721162308 | ↑     |
| 8-Methoxykynurenate                  | 4145400.54  | 6221198.67  | 0.015151515 | 1.309257407 | ↓     |
| Pyrimidodiazepine                    | 11014553.73 | 8762824.41  | 0.025974026 | 1.226512524 | ↑     |
| 2-trans,6-trans-Farnesal             | 11595588.98 | 4913982.24  | 0.025974026 | 1.217736188 | ↑     |
| Hydroxykynurenine                    | 5924084.97  | 6811506.52  | 0.041125541 | 1.188484502 | ↓     |
| N1-Acetylspermine                    | 12861530.87 | 5790597.28  | 0.002164502 | 1.614293396 | ↑     |
| Myristoleic acid                     | 55971523.22 | 32147550.35 | 0.041125541 | 1.17441067  | ↑     |
| Ergothioneine                        | 1271164367  | 756021405.1 | 0.041125541 | 1.318138017 | ↑     |
| Butyryl-L-carnitine                  | 32141296.26 | 187959650.1 | 0.004329004 | 1.46684074  | ↓     |
| Confertifolin                        | 25681805.95 | 4508674.95  | 0.008658009 | 1.56648481  | ↑     |
| Biotin                               | 4436597.45  | 8308373.22  | 0.002164502 | 1.719448995 | ↓     |
| Pindolol                             | 476389683.6 | 37141163.23 | 0.015151515 | 1.319390789 | ↑     |
| gamma-Glutamylcysteine               | 6819896.87  | 10391655.72 | 0.015151515 | 1.185800704 | ↓     |

| Name                                              | BLANK       | TAA         | P. value    | VIP         | Trend |
|---------------------------------------------------|-------------|-------------|-------------|-------------|-------|
| 10-Hydroxycarbazine                               | 5627749.14  | 11920527.37 | 0.041125541 | 1.144316847 | ↓     |
| Mannitol 1-phosphate                              | 61580768.49 | 27488537.68 | 0.004329004 | 1.425407789 | ↑     |
| Subaphylline                                      | 6783486.43  | 1660033.64  | 0.041125541 | 1.50065087  | ↑     |
| Retinol                                           | 147849505.1 | 234412737.6 | 0.041125541 | 1.136381432 | ↓     |
| Aurin                                             | 21275731.54 | 10824290.67 | 0.008658009 | 1.647136984 | ↑     |
| (2R,3R)-3-Methylglutamyl-5-semialdehyde-N6-lysine | 13095730.46 | 2111893.98  | 0.004329004 | 1.614250577 | ↑     |
| Saccharopine                                      | 40853602.45 | 66819289.69 | 0.025974026 | 1.275376805 | ↓     |
| Stearidonic acid                                  | 8053599.99  | 5295326.56  | 0.015151515 | 1.274420206 | ↑     |
| Oleic acid                                        | 1536517457  | 626596805.3 | 0.004329004 | 1.475629633 | ↑     |
| Glycitein                                         | 5795030.99  | 426116.82   | 0.004329004 | 1.693308005 | ↑     |
| 9-cis-Retinol                                     | 140410847.4 | 51692431.19 | 0.015151515 | 1.484911334 | ↑     |
| 9-OxoODE                                          | 87904860.06 | 36360126.05 | 0.015151515 | 1.399070086 | ↑     |
| 5'-Methylthioadenosine                            | 362306826.3 | 270643658.1 | 0.041125541 | 1.26396429  | ↑     |
| D-4'-Phosphopantothenate                          | 31940926.5  | 40774904.03 | 0.041125541 | 1.197417124 | ↓     |
| N(6)-[(Indol-3-yl)acetyl]-L-lysine                | 48947549.2  | 22743937.68 | 0.004329004 | 1.65433657  | ↑     |
| Glutathione                                       | 2970831641  | 5114579822  | 0.015151515 | 1.216674368 | ↓     |
| Nadolol                                           | 208493611.2 | 27705974.56 | 0.041125541 | 1.23778051  | ↑     |
| Decanoyl-L-carnitine                              | 49445759.02 | 36177161.68 | 0.041125541 | 1.368471367 | ↑     |
| Enoxacin                                          | 41014473.3  | 10669730.12 | 0.025974026 | 1.042600798 | ↑     |
| UMP                                               | 10533756.74 | 97041518.85 | 0.025974026 | 1.28827863  | ↓     |
| Prostaglandin H2                                  | 164945160   | 290343283.1 | 0.041125541 | 1.141207946 | ↓     |
| 15(S)-HPETE                                       | 2014411.29  | 4161826.95  | 0.002164502 | 1.61150999  | ↓     |
| 2-Hydroxy-6-                                      | 55702790.88 | 40259364.47 | 0.041125541 | 1.1616853   | ↑     |

| Name                                   | BLANK       | TAA         | P. value    | VIP         | Trend |
|----------------------------------------|-------------|-------------|-------------|-------------|-------|
| pentadecylbenzoic acid                 |             |             |             |             |       |
| Prostaglandin G2                       | 17346128.66 | 4595308.3   | 0.008658009 | 1.44901628  | ↑     |
| Chelirubine                            | 9645070.19  | 32600532.77 | 0.041125541 | 1.318130084 | ↓     |
| Cortisol                               | 25547320.59 | 7422790.34  | 0.002164502 | 1.732292653 | ↑     |
| GMP                                    | 80576345.03 | 32146455.64 | 0.015151515 | 1.435515076 | ↑     |
| Isolithocholic acid                    | 230641618   | 69395722.18 | 0.008658009 | 1.35900608  | ↑     |
| Risperidone                            | 17495500.79 | 1556498.77  | 0.002164502 | 1.502729351 | ↑     |
| S-Hexyl-glutathione                    | 9345778.91  | 6237690.47  | 0.025974026 | 1.25195854  | ↑     |
| 5-Dehydroepisterol                     | 17049938.1  | 8953670.13  | 0.025974026 | 1.393300462 | ↑     |
| S-Succinylglutathione                  | 16873181.51 | 8155859     | 0.008658009 | 1.327636687 | ↑     |
| 5alpha-Ergosta-7,22-diene-3beta,5-diol | 47133598.43 | 12900523.09 | 0.004329004 | 1.50856746  | ↑     |
| S-Glutathionyl-L-cysteine              | 41014611.48 | 77975485.23 | 0.025974026 | 1.237600815 | ↓     |
| alpha-Tocopherol                       | 89121142.07 | 28959996.05 | 0.004329004 | 1.607105319 | ↑     |
| Isovitexin                             | 289590868.7 | 133822832.5 | 0.025974026 | 1.095356317 | ↑     |
| Retinoyl b-glucuronide                 | 267047402.2 | 611343988.3 | 0.041125541 | 1.280348481 | ↓     |
| 26-Hydroxyecdysone                     | 1508507182  | 111806528   | 0.015151515 | 1.595340893 | ↑     |
| Taurochenodesoxycholic acid            | 233816147.7 | 69441000.58 | 0.015151515 | 1.308270012 | ↑     |
| Deltaline                              | 24646798.82 | 12874446.19 | 0.025974026 | 1.25294955  | ↑     |
| Taurohyocholate                        | 1508197135  | 7012701841  | 0.015151515 | 1.31349112  | ↓     |
| Avermectin A2b aglycone                | 24109241.57 | 7802215.52  | 0.041125541 | 1.108903112 | ↑     |
| (R)-3-Hydroxybutyric acid              | 904429355.6 | 626464396.7 | 0.004329004 | 1.63797745  | ↑     |
| L-Serine                               | 360430680.4 | 103920061.9 | 0.008658009 | 1.380711515 | ↑     |
| Creatinine                             | 17257921.97 | 652624.96   | 0.025974026 | 1.582434358 | ↑     |



| Name                              | BLANK       | TAA         | P. value    | VIP         | Trend |
|-----------------------------------|-------------|-------------|-------------|-------------|-------|
| D-Proline                         | 7539784.05  | 5649147.97  | 0.025974026 | 1.364124506 | ↑     |
| Mesaconate                        | 5120737.45  | 12871677.44 | 0.008658009 | 1.653657154 | ↓     |
| Phenyl acetate                    | 88520276.71 | 120631852.5 | 0.008658009 | 1.434194779 | ↓     |
| O-Phosphoethanolamine             | 61068883.11 | 37091295.41 | 0.041125541 | 1.045995319 | ↑     |
| (S)-5-Amino-3-oxohexanoate        | 29616074.67 | 15291137.47 | 0.008658009 | 1.350235147 | ↑     |
| Oxoglutaric acid                  | 1639185.9   | 4124026.5   | 0.025974026 | 1.379853975 | ↓     |
| L-Xylonate                        | 133763879.1 | 34249990.91 | 0.008658009 | 1.568668371 | ↑     |
| 3-(2-Hydroxyphenyl)propanoic acid | 4313506.81  | 2758869.51  | 0.004329004 | 1.570269652 | ↑     |
| D-Xylose                          | 3890984.99  | 12316271.4  | 0.015151515 | 1.328313081 | ↓     |
| myo-Inositol                      | 6302649.66  | 18938150.63 | 0.002164502 | 1.417085283 | ↓     |
| D-Phenylalanine                   | 47620799.26 | 22282792.35 | 0.008658009 | 1.508503162 | ↑     |
| Thioguanine                       | 186415051.4 | 128123546.4 | 0.025974026 | 1.326225364 | ↑     |
| Suberic acid                      | 54701657.9  | 26604520.36 | 0.041125541 | 1.239880765 | ↑     |
| 1H-Indole-3-acetamide             | 3987901.35  | 1038777.15  | 0.025974026 | 1.143225055 | ↑     |
| Hippuric acid                     | 38981836.37 | 13241293.89 | 0.025974026 | 1.49063554  | ↑     |
| N6-Acetyl-L-lysine                | 33722683.1  | 14798914.17 | 0.041125541 | 1.139322723 | ↑     |
| N-Acetylglutamic acid             | 641798146.1 | 1354539885  | 0.025974026 | 1.221410167 | ↓     |
| N-Acetylmethionine                | 80967277.26 | 19817801.33 | 0.002164502 | 1.780889894 | ↑     |
| 5-Hydroxyindoleacetic acid        | 33087481.21 | 67523145.97 | 0.008658009 | 1.56147629  | ↓     |
| D-Glucuronic Acid                 | 62849788.02 | 39526393.26 | 0.015151515 | 1.335459705 | ↑     |
| L-Arogenate                       | 5847835.77  | 4532079.06  | 0.041125541 | 1.258422662 | ↑     |
| N-Acetyl-D-glucosamine            | 25821840.92 | 10727220.18 | 0.015151515 | 1.304866285 | ↑     |

| Name                                 | BLANK       | TAA         | P. value    | VIP         | Trend |
|--------------------------------------|-------------|-------------|-------------|-------------|-------|
| Nicotinate D-ribonucleoside          | 49244262.37 | 31247051.95 | 0.008658009 | 1.461200076 | ↑     |
| 1-Hexadecanol                        | 2270928.52  | 7879784.54  | 0.002164502 | 1.786619354 | ↓     |
| 2,7-Dihydroxy-4'-methoxyisoflavanone | 2508094.49  | 4604204.42  | 0.041125541 | 1.037882572 | ↓     |
| Estradiol                            | 17679622.04 | 1698228.73  | 0.041125541 | 1.576425999 | ↑     |
| 6-Phospho-2-dehydro-D-gluconate      | 1836071.84  | 1057438.12  | 0.002164502 | 1.694171497 | ↑     |
| Hexadecanedioate                     | 34852928.54 | 11110239.95 | 0.041125541 | 1.234857958 | ↑     |
| 13-OxoODE                            | 24810295.87 | 13320825.41 | 0.004329004 | 1.582618219 | ↑     |
| Arachidic acid                       | 196625633.2 | 68169126.73 | 0.025974026 | 1.251889569 | ↑     |
| 12,13-DHOME                          | 668757041.1 | 190013396.2 | 0.004329004 | 1.417552226 | ↑     |
| CMP                                  | 42035676.78 | 84387796.11 | 0.041125541 | 1.332352019 | ↓     |
| 11-Dehydrocorticosterone             | 289003280.3 | 30721449.31 | 0.015151515 | 1.602581614 | ↑     |
| PGA1                                 | 6682043.49  | 1225764.74  | 0.025974026 | 1.068142218 | ↑     |
| Erucic acid                          | 8565595.89  | 29308264.22 | 0.008658009 | 1.489102027 | ↓     |
| Cellobiose                           | 595399994.5 | 161724898.1 | 0.025974026 | 1.474433263 | ↑     |
| 3'-AMP                               | 14725560.95 | 37376774.01 | 0.025974026 | 1.574412937 | ↓     |
| Prostaglandin F3a                    | 1839180.25  | 4881778.16  | 0.041125541 | 1.108596895 | ↓     |
| Lipoxin A4                           | 14541905.51 | 1145850.63  | 0.002164502 | 1.784099143 | ↑     |
| Xanthohumol                          | 3651880.93  | 245552.98   | 0.004329004 | 1.694420883 | ↑     |
| Rosmarinic acid                      | 9311073.72  | 1461237.75  | 0.025974026 | 1.370539429 | ↑     |
| Deoxycorticosterone acetate          | 36786802.38 | 7952640.87  | 0.015151515 | 1.475801303 | ↑     |
| Deoxycholic acid                     | 3835360.65  | 8737576.72  | 0.041125541 | 1.197882247 | ↓     |
| Mitragynine                          | 48244131.39 | 10134384.22 | 0.008658009 | 1.618130055 | ↑     |
| LysoPA(16_0_0_0)                     | 18443218.73 | 11380029.42 | 0.025974026 | 1.295796765 | ↑     |

| <b>Name</b>                          | <b>BLANK</b> | <b>TAA</b>  | <b>P. value</b> | <b>VIP</b>  | <b>Trend</b> |
|--------------------------------------|--------------|-------------|-----------------|-------------|--------------|
| Alpha-Tocotrienol                    | 125320058.9  | 21913378.84 | 0.008658009     | 1.610847923 | ↑            |
| Abscisic acid glucose ester          | 661408.6     | 4361895.19  | 0.004329004     | 1.615995902 | ↓            |
| Phosphonoformyl-CMP                  | 4065570.13   | 10331981.04 | 0.041125541     | 1.169086344 | ↓            |
| Folic acid                           | 3713942.23   | 9516408.09  | 0.008658009     | 1.554774818 | ↓            |
| Adenylsuccinic acid                  | 3190710.8    | 4837957.53  | 0.025974026     | 1.279728778 | ↓            |
| Perfluorooctanesulfonic acid         | 9566321.78   | 4914666.82  | 0.002164502     | 1.677335518 | ↑            |
| Telmisartan                          | 922917.89    | 132228.39   | 0.002164502     | 1.715240001 | ↑            |
| Probucol                             | 1333496.52   | 5057138.03  | 0.008658009     | 1.475824282 | ↓            |
| Leukotriene C4                       | 641634.06    | 245586.35   | 0.041125541     | 1.225977377 | ↑            |
| 2-(S-Glutathionyl)acetyl glutathione | 7387612.89   | 15735253.02 | 0.041125541     | 1.087845948 | ↓            |

**Table S3 The metabolites significantly up-or down-regulated in VAH vs TAA (mean)**

| <b>Name</b>                   | <b>VAH</b>  | <b>TAA</b>  | <b>P. value</b> | <b>VIP</b>  | <b>Trend</b> |
|-------------------------------|-------------|-------------|-----------------|-------------|--------------|
| Triethylamine                 | 8972218.51  | 21484548.63 | 0.002164502     | 1.634962968 | ↓            |
| Dimethylglycine               | 87109667.7  | 69569613.33 | 0.015151515     | 1.385529383 | ↑            |
| gamma-Aminobutyric acid       | 30747273.14 | 6635177.77  | 0.025974026     | 1.222165991 | ↑            |
| Benzaldehyde                  | 89103202.05 | 43846690.03 | 0.002164502     | 1.687223362 | ↑            |
| Cytosine                      | 68358070.36 | 28127053.17 | 0.004329004     | 1.447887365 | ↑            |
| 1-Pyrroline-2-carboxylic acid | 9029362.2   | 37620699.41 | 0.004329004     | 1.212386461 | ↓            |
| Betaine                       | 258730926   | 370952953.8 | 0.015151515     | 1.175117973 | ↓            |

| Name                             | VAH         | TAA         | P. value    | VIP         | Trend |
|----------------------------------|-------------|-------------|-------------|-------------|-------|
| 2-Methylserine                   | 27860772.88 | 57427425.89 | 0.002164502 | 1.501102565 | ↓     |
| Styrene Oxide                    | 14541979.56 | 46595937.19 | 0.025974026 | 1.316007045 | ↓     |
| 4-Hydroxybenzaldehyde            | 55987370.27 | 38626449.35 | 0.041125541 | 1.00034657  | ↑     |
| Taurine                          | 147908460.2 | 106993673.7 | 0.025974026 | 1.020195866 | ↑     |
| Triacetate lactone               | 172175580.6 | 77798553.51 | 0.008658009 | 1.256437312 | ↑     |
| gamma-Amino-gamma-cyanobutanoate | 14228507.84 | 73807618.61 | 0.002164502 | 1.560096014 | ↓     |
| Pipecolic acid                   | 321712502.9 | 1803344524  | 0.002164502 | 1.443523959 | ↓     |
| L-Leucine                        | 22499582.84 | 28559827.38 | 0.004329004 | 1.541601306 | ↓     |
| cis-4-Hydroxy-D-proline          | 5563798.82  | 18092216.7  | 0.025974026 | 1.020164171 | ↓     |
| 2-Hydroxyphenethylamine          | 32602080.93 | 26910106.98 | 0.041125541 | 1.033451724 | ↑     |
| 1-Hydroxymethylnaphthalene       | 5225454.1   | 202709506.1 | 0.002164502 | 1.678909187 | ↓     |
| Ectoine                          | 8003196.92  | 13782967.01 | 0.002164502 | 1.511748343 | ↓     |
| 8-Hydroxyquinoline               | 180643353.9 | 311717432.3 | 0.004329004 | 1.299912331 | ↓     |
| L-2-Hydroxyglutaric acid         | 18644739.99 | 12212918.75 | 0.008658009 | 1.354001764 | ↑     |
| Diethylphosphoric acid           | 6958352.97  | 11427776.04 | 0.008658009 | 1.217654306 | ↓     |
| Uracil 5-carboxylate             | 78312306.47 | 14414073.15 | 0.002164502 | 1.727521601 | ↑     |
| Tryptamine                       | 8454968.6   | 1329248.08  | 0.002164502 | 1.713541941 | ↑     |
| N(6)-Methyllysine                | 38750309.86 | 23326235    | 0.015151515 | 1.163654768 | ↑     |
| L-Rhamnono-1,4-lactone           | 17846948.93 | 12620908.45 | 0.002164502 | 1.393682452 | ↑     |
| L-Carnitine                      | 3132876643  | 6528207137  | 0.025974026 | 1.345417245 | ↓     |
| Caffeic acid                     | 5869030.65  | 3756431.75  | 0.002164502 | 1.545362052 | ↑     |
| S-Methyl-L-methionine            | 39714852.96 | 25808457.35 | 0.015151515 | 1.272729821 | ↑     |
| 3,4-                             | 501269638   | 1082424522  | 0.002164502 | 1.576656961 | ↓     |

| Name                                | VAH         | TAA         | P. value    | VIP         | Trend |
|-------------------------------------|-------------|-------------|-------------|-------------|-------|
| Dihydroxyphenylpropanoate           |             |             |             |             |       |
| e                                   |             |             |             |             |       |
| Jasmone                             | 51491199.4  | 14361176.77 | 0.015151515 | 1.294519462 | ↑     |
| D-synephrine                        | 123384628.3 | 90645817.56 | 0.002164502 | 1.648351103 | ↑     |
| Pyridoxamine                        | 6896273.34  | 3675876.19  | 0.002164502 | 1.390358072 | ↑     |
| (S)-4-Hydroxymandelate              | 14905503.09 | 88325917.71 | 0.002164502 | 1.521588023 | ↓     |
| Tetrahydrodipicolinate              | 119079955.7 | 66572186.73 | 0.008658009 | 1.306132054 | ↑     |
| Gabapentin                          | 31328094.35 | 180048386.8 | 0.002164502 | 1.597880206 | ↓     |
| Iminoarginine                       | 131782496.1 | 34030769.36 | 0.002164502 | 1.526226402 | ↑     |
| Formiminoglutamic acid              | 71203073.59 | 43078813.55 | 0.041125541 | 1.10681219  | ↑     |
| 2-Hydroxy-3-oxoadipate              | 23800390.15 | 21948699.81 | 0.041125541 | 1.088678172 | ↑     |
| Canavanine                          | 106115856.7 | 7163817.87  | 0.002164502 | 1.569682027 | ↑     |
| N-Formyl-L-methionine               | 137940172.4 | 28682869.2  | 0.004329004 | 1.347157401 | ↑     |
| Methyleugenol                       | 33235914.04 | 168342569.2 | 0.002164502 | 1.61159344  | ↓     |
| (S)-beta-Tyrosine                   | 13170669225 | 1847322815  | 0.002164502 | 1.43717117  | ↑     |
| Epinephrine                         | 4465115.54  | 3004888.48  | 0.041125541 | 1.405381587 | ↑     |
| Phosphorylcholine                   | 862344934   | 4248831523  | 0.002164502 | 1.738073819 | ↓     |
| (Z)-But-1-ene-1,2,4-tricarboxylate  | 8240523.66  | 3886006.03  | 0.002164502 | 1.18767512  | ↑     |
| 3-Indoleacrylate                    | 19679378.52 | 6354151.63  | 0.004329004 | 1.304457339 | ↑     |
| N1-Acetylspermidine                 | 42992823.6  | 16846746.01 | 0.002164502 | 1.357038986 | ↑     |
| Homocitrulline                      | 36267318.21 | 10785566.71 | 0.041125541 | 1.109209966 | ↑     |
| Isocitric acid                      | 65331735.98 | 81408123.98 | 0.015151515 | 1.132671852 | ↓     |
| 3-Carbamoyl-2-phenylpropionaldehyde | 68171039.42 | 2250035.5   | 0.002164502 | 1.655096955 | ↑     |

| Name                              | VAH         | TAA         | P. value    | VIP         | Trend |
|-----------------------------------|-------------|-------------|-------------|-------------|-------|
| Indolepyruvate                    | 12015922.57 | 17771615.24 | 0.002164502 | 1.470856451 | ↓     |
| N5-(L-1-Carboxyethyl)-L-ornithine | 28591066.5  | 14424407.08 | 0.004329004 | 1.47912818  | ↑     |
| Indolelactic acid                 | 7277997.84  | 12225201.73 | 0.002164502 | 1.535777525 | ↓     |
| (-)-Jasmonic acid                 | 18591057.24 | 5455931.93  | 0.015151515 | 1.286921996 | ↑     |
| Propionylcarnitine                | 97760309.62 | 19067853.14 | 0.002164502 | 1.50205879  | ↑     |
| N-Acetylserotonin                 | 26747256.83 | 39108787.82 | 0.025974026 | 1.125942033 | ↓     |
| Gamma-glutamyl-L-putrescine       | 16396554.81 | 7827128.19  | 0.015151515 | 1.111789189 | ↑     |
| gamma-Glutamylalanine             | 15576958.97 | 37368304.67 | 0.002164502 | 1.73806156  | ↓     |
| Capsidiol                         | 5451463.21  | 1851895.36  | 0.008658009 | 1.473806333 | ↑     |
| 8-Methoxykynurenate               | 18997830.15 | 6221198.67  | 0.015151515 | 1.361573979 | ↑     |
| 2-trans,6-trans-Farnesal          | 15739598.69 | 4913982.24  | 0.002164502 | 1.507826494 | ↑     |
| Hydroxykynurenine                 | 3362379.33  | 6811506.52  | 0.002164502 | 1.099978211 | ↓     |
| N2-Succinyl-L-ornithine           | 4016256.74  | 12682335.5  | 0.002164502 | 1.340486815 | ↓     |
| Confertifolin                     | 22414523.35 | 4508674.95  | 0.008658009 | 1.297451496 | ↑     |
| Carbamazepine                     | 43760511.56 | 16717658.02 | 0.002164502 | 1.17139649  | ↑     |
| Felbamate                         | 11344995.13 | 5220527.21  | 0.015151515 | 1.176677905 | ↑     |
| Equol                             | 64403582.67 | 30630989.82 | 0.008658009 | 1.264742561 | ↑     |
| Lumichrome                        | 508275623.3 | 346809934.2 | 0.015151515 | 1.286161354 | ↑     |
| Ribavirin                         | 103261722.9 | 57456771.79 | 0.041125541 | 1.212081847 | ↑     |
| Cytidine                          | 369449772.4 | 264050524.7 | 0.002164502 | 1.138378734 | ↑     |
| Uridine                           | 395532964.6 | 124575654   | 0.008658009 | 1.196319389 | ↑     |
| Biotin                            | 3624414.08  | 8308373.22  | 0.002164502 | 1.626264182 | ↓     |
| Pindolol                          | 80227052.61 | 37141163.23 | 0.004329004 | 1.388357831 | ↑     |

| Name                                              | VAH         | TAA         | P. value    | VIP         | Trend |
|---------------------------------------------------|-------------|-------------|-------------|-------------|-------|
| gamma-Glutamylcysteine                            | 5627454.58  | 10391655.72 | 0.002164502 | 1.312377842 | ↓     |
| Muramic acid                                      | 1029973975  | 516798227.6 | 0.002164502 | 1.388315584 | ↑     |
| Daidzein                                          | 7123184.69  | 1643166.41  | 0.041125541 | 1.242174532 | ↑     |
| Linatine                                          | 12956389.09 | 19389719.02 | 0.015151515 | 1.303728428 | ↓     |
| Mannitol 1-phosphate                              | 100493100.4 | 27488537.68 | 0.002164502 | 1.639739723 | ↑     |
| Subaphylline                                      | 3796522.46  | 1660033.64  | 0.004329004 | 1.313233388 | ↑     |
| Honokiol                                          | 63674542.25 | 14147290.69 | 0.002164502 | 1.387991709 | ↑     |
| Adenosine                                         | 612067720.2 | 275188972   | 0.025974026 | 1.034343986 | ↑     |
| Baicalein                                         | 7602296.94  | 5091998.09  | 0.025974026 | 1.130977222 | ↑     |
| Aurin                                             | 16317253.66 | 10824290.67 | 0.025974026 | 1.230180023 | ↑     |
| (2R,3R)-3-Methylglutamyl-5-semialdehyde-N6-lysine | 7715296.75  | 2111893.98  | 0.004329004 | 1.551909582 | ↑     |
| (2R,3R)-3-Methylornithinyl-N6-lysine              | 9408132.94  | 4650419.89  | 0.025974026 | 1.099093405 | ↑     |
| Saccharopine                                      | 40857085.41 | 66819289.69 | 0.015151515 | 1.141892578 | ↓     |
| Stearidonic acid                                  | 13595155.23 | 5295326.56  | 0.004329004 | 1.397688835 | ↑     |
| 1-(3,4-Dihydroxyphenyl)-5-hydroxy-3-decanone      | 13191600.71 | 7111497.65  | 0.002164502 | 1.525961722 | ↑     |
| Oleic acid                                        | 1490412646  | 626596805.3 | 0.015151515 | 1.352413255 | ↑     |
| Glycitein                                         | 10501523.72 | 426116.82   | 0.002164502 | 1.727838485 | ↑     |
| Retinal                                           | 26453402.07 | 7815250.17  | 0.025974026 | 1.405296683 | ↑     |
| L-Octanoylcarnitine                               | 15842431.59 | 4786438.05  | 0.004329004 | 1.500971401 | ↑     |
| 13-L-Hydroperoxylinoleic acid                     | 259190789.4 | 82161105.86 | 0.002164502 | 1.512652314 | ↑     |
| Sumatriptan                                       | 1312943.24  | 17890386.47 | 0.002164502 | 1.556406168 | ↓     |

| Name                                            | VAH         | TAA         | P. value    | VIP         | Trend |
|-------------------------------------------------|-------------|-------------|-------------|-------------|-------|
| 9-cis-Retinoic acid                             | 44073226.35 | 16312552.82 | 0.002164502 | 1.422318044 | ↑     |
| 19(S)-HETE                                      | 183818256.3 | 34623934.42 | 0.002164502 | 1.6785718   | ↑     |
| N(6)-[(Indol-3-yl)acetyl]-L-lysine              | 36477036.7  | 22743937.68 | 0.008658009 | 1.173157421 | ↑     |
| 4'-Oxonebramine                                 | 28318568.75 | 13717152.73 | 0.002164502 | 1.375520714 | ↑     |
| Capsaicin                                       | 2113634.68  | 7587543.25  | 0.025974026 | 1.167084265 | ↓     |
| Aflatoxin B1                                    | 36454647.02 | 626688.27   | 0.002164502 | 1.714357691 | ↑     |
| Decanoyl-L-carnitine                            | 24419404.04 | 36177161.68 | 0.025974026 | 1.196880341 | ↓     |
| 15(S)-HPETE                                     | 972938.26   | 4161826.95  | 0.002164502 | 1.646640325 | ↓     |
| L-Alanyl-gamma-D-glutamyl-L-lysine              | 2572775.54  | 1678405.09  | 0.008658009 | 1.352169465 | ↑     |
| 2-Hydroxy-6-pentadecylbenzoic acid              | 147161550.3 | 40259364.47 | 0.002164502 | 1.692204874 | ↑     |
| 6-Ketoprostaglandin E1                          | 141213945.5 | 37388487.37 | 0.041125541 | 1.369536367 | ↑     |
| (13E)-11a-Hydroxy-9,15-dioxoprost-13-enoic acid | 28312086.29 | 4991254.49  | 0.002164502 | 1.439502722 | ↑     |
| Nitrendipine                                    | 83078618.05 | 29747233.65 | 0.004329004 | 1.397450192 | ↑     |
| Chelirubine                                     | 483358.73   | 32600532.77 | 0.002164502 | 1.527438774 | ↓     |
| Cortisol                                        | 34863306.96 | 7422790.34  | 0.002164502 | 1.722842539 | ↑     |
| GMP                                             | 97432181.9  | 32146455.64 | 0.002164502 | 1.648501978 | ↑     |
| Isolithocholic acid                             | 433368702.6 | 69395722.18 | 0.025974026 | 1.27679546  | ↑     |
| 11b,17a,21-Trihydroxypregnenolone               | 41953615.56 | 20811514    | 0.002164502 | 1.305063877 | ↑     |
| Risperidone                                     | 128154720.3 | 1556498.77  | 0.002164502 | 1.706719571 | ↑     |
| 5alpha-Ergosta-7,22-diene                       | 33099424.61 | 12900523.09 | 0.025974026 | 1.269497572 | ↑     |



| Name                        | VAH         | TAA         | P. value    | VIP         | Trend |
|-----------------------------|-------------|-------------|-------------|-------------|-------|
| 3beta,5-diol                |             |             |             |             |       |
| Glutathionylspermidine      | 2882232.24  | 292596.01   | 0.002164502 | 1.406615789 | ↑     |
| S-Glutathionyl-L-cysteine   | 15690009.93 | 77975485.23 | 0.002164502 | 1.542489621 | ↓     |
| Hecogenin                   | 4384710.16  | 1532053.23  | 0.002164502 | 1.172671906 | ↑     |
| Gentamicin C1a              | 4220091.17  | 18220474.28 | 0.002164502 | 1.564411437 | ↓     |
| Isovitexin                  | 345557988.7 | 133822832.5 | 0.008658009 | 1.079089888 | ↑     |
| 3-Dehydroecdysone           | 51237820.34 | 207169699.3 | 0.002164502 | 1.388804994 | ↓     |
| 3-Epiccdysone               | 244064955.6 | 24519160.13 | 0.002164502 | 1.529607307 | ↑     |
| 26-Hydroxyecdysone          | 470054957.9 | 111806528   | 0.004329004 | 1.368159378 | ↑     |
| Taurochenodesoxycholic acid | 512828287.6 | 69441000.58 | 0.004329004 | 1.430554396 | ↑     |
| Deltaline                   | 20587227.02 | 12874446.19 | 0.041125541 | 1.068772269 | ↑     |
| Protoporphyrinogen IX       | 6861316.68  | 23727536.83 | 0.002164502 | 1.549005422 | ↓     |
| NADP                        | 61770534.04 | 16575865.49 | 0.015151515 | 1.273102252 | ↑     |
| 2-Ketobutyric acid          | 78040687.98 | 36128869.88 | 0.002164502 | 1.33229699  | ↑     |
| (R)-3-Hydroxybutyric acid   | 789532321.5 | 626464396.7 | 0.025974026 | 1.295324926 | ↑     |
| L-Serine                    | 355173443.4 | 103920061.9 | 0.008658009 | 1.254942381 | ↑     |
| Uracil                      | 9634822.35  | 18145335.35 | 0.002164502 | 1.162773147 | ↓     |
| Creatinine                  | 17352976.19 | 652624.96   | 0.002164502 | 1.709992448 | ↑     |
| D-Proline                   | 6926787.89  | 5649147.97  | 0.015151515 | 1.248517709 | ↑     |
| Threonate                   | 10670297.79 | 2875861.87  | 0.002164502 | 1.400686061 | ↑     |
| Mesaconate                  | 7368317.25  | 12871677.44 | 0.025974026 | 1.219687066 | ↓     |
| Phenyl acetate              | 81075619.15 | 120631852.5 | 0.002164502 | 1.455420877 | ↓     |
| Salicylic acid              | 5314938.13  | 529427.88   | 0.004329004 | 1.387099508 | ↑     |
| O-Phosphoethanolamine       | 10997681.34 | 37091295.41 | 0.002164502 | 1.31808914  | ↓     |

| Name                              | VAH         | TAA         | P. value    | VIP         | Trend |
|-----------------------------------|-------------|-------------|-------------|-------------|-------|
| 1H-Indole-3-carboxaldehyde        | 21875967.4  | 66276494.79 | 0.002164502 | 1.525519571 | ↓     |
| Oxoglutaric acid                  | 1458646.33  | 4124026.5   | 0.025974026 | 1.218210172 | ↓     |
| L-Glutamic acid                   | 758696790.1 | 1860520154  | 0.008658009 | 1.195525003 | ↓     |
| L-Xylonate                        | 147173715.3 | 34249990.91 | 0.002164502 | 1.417008509 | ↑     |
| 3-(2-Hydroxyphenyl)propanoic acid | 3778722.12  | 2758869.51  | 0.015151515 | 1.187016887 | ↑     |
| D-Xylose                          | 2342744.08  | 12316271.4  | 0.004329004 | 1.363943672 | ↓     |
| D-Ribose                          | 31137248.66 | 92427526.03 | 0.008658009 | 1.377390161 | ↓     |
| Aminoadipic acid                  | 8040410.41  | 44843961.38 | 0.002164502 | 1.647435182 | ↓     |
| beta-D-Glucosamine                | 33357128.93 | 17165077.68 | 0.025974026 | 1.162791037 | ↑     |
| 1D-chiro-Inositol                 | 13392001.16 | 76863861.83 | 0.002164502 | 1.368376337 | ↓     |
| Thioguanine                       | 242030713.2 | 128123546.4 | 0.015151515 | 1.280284762 | ↑     |
| Taurocyamine                      | 25471112.04 | 14043117.85 | 0.004329004 | 1.420015022 | ↑     |
| Homogentisic acid                 | 1606266.94  | 1116972.71  | 0.041125541 | 1.040482281 | ↑     |
| Dehydroascorbate                  | 41114009.02 | 80295145.01 | 0.041125541 | 1.030738115 | ↓     |
| Pyrophosphate                     | 1130318636  | 219630241.6 | 0.004329004 | 1.318525303 | ↑     |
| Hippuric acid                     | 32576620.96 | 13241293.89 | 0.041125541 | 1.011049686 | ↑     |
| 1-Keto-D-chiro-inositol           | 1172426.83  | 3337711.02  | 0.015151515 | 1.163894057 | ↓     |
| L-Tyrosine                        | 399183585.6 | 291167855.1 | 0.002164502 | 1.215573164 | ↑     |
| Hydroxyphenyllactic acid          | 11465907.82 | 17777903.1  | 0.004329004 | 1.356046508 | ↓     |
| N6-Acetyl-L-lysine                | 23148712.21 | 14798914.17 | 0.041125541 | 1.128129907 | ↑     |
| Kynurenic acid                    | 6333760.39  | 4383517.26  | 0.008658009 | 1.164314605 | ↑     |
| N-Acetylglutamic acid             | 537012561.5 | 1354539885  | 0.008658009 | 1.238209312 | ↓     |

| Name                                 | VAH         | TAA         | P. value    | VIP         | Trend |
|--------------------------------------|-------------|-------------|-------------|-------------|-------|
| N-Acetylmethionine                   | 66187362.79 | 19817801.33 | 0.041125541 | 1.139643538 | ↑     |
| 5-Hydroxyindoleacetic acid           | 24441561.1  | 67523145.97 | 0.002164502 | 1.565756258 | ↓     |
| Citric acid                          | 653610571.9 | 969541924.5 | 0.025974026 | 1.238217068 | ↓     |
| D-Glucuronic Acid                    | 24013379.36 | 39526393.26 | 0.008658009 | 1.184717748 | ↓     |
| Gluconic acid                        | 2395087121  | 772081751.4 | 0.002164502 | 1.533653719 | ↑     |
| L-Tryptophan                         | 936600076.6 | 331531331.5 | 0.002164502 | 1.012640544 | ↑     |
| Galactaric acid                      | 11226689.45 | 52759081.08 | 0.004329004 | 1.53298995  | ↓     |
| D-Ribulose 5-phosphate               | 117997.46   | 603299.06   | 0.002164502 | 1.354882622 | ↓     |
| 12-Hydroxydodecanoic acid            | 18287590.92 | 4533846.52  | 0.002164502 | 1.63550596  | ↑     |
| N-Acetylmannosamine                  | 93812363.05 | 139530834   | 0.041125541 | 1.045173416 | ↓     |
| N-Acetyl-D-glucosamine               | 24785604.71 | 10727220.18 | 0.004329004 | 1.208909454 | ↑     |
| Carnosine                            | 27751109.57 | 11975841.21 | 0.008658009 | 1.151457157 | ↑     |
| Ribose 1-phosphate                   | 15218864.68 | 100151027.2 | 0.008658009 | 1.380980191 | ↓     |
| Melatonin                            | 8901232.59  | 1996106.12  | 0.002164502 | 1.334442843 | ↑     |
| Biopterin                            | 867893.66   | 5236161.11  | 0.002164502 | 1.36794038  | ↓     |
| 1-Hexadecanol                        | 1060339.31  | 7879784.54  | 0.002164502 | 1.724189729 | ↓     |
| Pseudouridine                        | 2044997.16  | 2866252.05  | 0.025974026 | 1.004300264 | ↓     |
| (S)-Pinoembrin                       | 4231631.77  | 262265.92   | 0.002164502 | 1.572055329 | ↑     |
| 2,7-Dihydroxy-4'-methoxyisoflavanone | 8318535.53  | 4604204.42  | 0.008658009 | 1.280906576 | ↑     |
| 17a-Estradiol                        | 425636033.8 | 781749279.7 | 0.041125541 | 1.114212829 | ↓     |
| Estradiol                            | 12666348.21 | 1698228.73  | 0.002164502 | 1.420543213 | ↑     |
| 6-Phospho-2-dehydro-D-gluconate      | 1447384.38  | 1057438.12  | 0.002164502 | 1.416911983 | ↑     |
| Pendimethalin                        | 103931.75   | 1286122.26  | 0.002164502 | 1.398622856 | ↓     |

| Name                         | VAH         | TAA         | P. value    | VIP         | Trend |
|------------------------------|-------------|-------------|-------------|-------------|-------|
| Cinchonidine                 | 17572357.06 | 5213527.34  | 0.025974026 | 1.246498451 | ↑     |
| 13-OxoODE                    | 31386525.2  | 13320825.41 | 0.002164502 | 1.648661671 | ↑     |
| (-)-Epigallocatechin         | 172982271   | 93867490.12 | 0.025974026 | 1.038985462 | ↑     |
| 11-Dehydrocorticosterone     | 299366778.4 | 30721449.31 | 0.002164502 | 1.562734342 | ↑     |
| Acebutolol                   | 491972.89   | 2422727.28  | 0.004329004 | 1.373826213 | ↓     |
| Esculin                      | 1553417.52  | 4537467.08  | 0.008658009 | 1.466158827 | ↓     |
| Mannobiose                   | 27458316.33 | 12411374.62 | 0.002164502 | 1.076969168 | ↑     |
| 3'-AMP                       | 9107350.08  | 37376774.01 | 0.004329004 | 1.530403993 | ↓     |
| Lipoxin A4                   | 12315348.41 | 1145850.63  | 0.002164502 | 1.53724612  | ↑     |
| Xanthohumol                  | 2988909.1   | 245552.98   | 0.002164502 | 1.528746232 | ↑     |
| Deoxycorticosterone acetate  | 22420600.66 | 7952640.87  | 0.002164502 | 1.597188988 | ↑     |
| N-Acetylactosamine           | 1833080.65  | 1058964.34  | 0.004329004 | 1.139534064 | ↑     |
| CDP                          | 10029782.05 | 5411035.62  | 0.015151515 | 1.176381277 | ↑     |
| Mitragynine                  | 33264320.57 | 10134384.22 | 0.041125541 | 1.031257761 | ↑     |
| LysoPA(16_0_0_0)             | 39100409.77 | 11380029.42 | 0.002164502 | 1.472790747 | ↑     |
| Phosphonoformyl-CMP          | 2751007.72  | 10331981.04 | 0.025974026 | 1.143933081 | ↓     |
| Folic acid                   | 2301379.44  | 9516408.09  | 0.002164502 | 1.632566167 | ↓     |
| CDP-Ethanolamine             | 1350866.22  | 5958358.75  | 0.002164502 | 1.411784751 | ↓     |
| Perfluorooctanesulfonic acid | 16619718.28 | 4914666.82  | 0.002164502 | 1.61560906  | ↑     |
| ATP                          | 2775615.93  | 1250204.92  | 0.041125541 | 1.09012785  | ↑     |
| Telmisartan                  | 506455.59   | 132228.39   | 0.041125541 | 1.034905898 | ↑     |
| Leukotriene C4               | 914086.98   | 245586.35   | 0.002164502 | 1.352931281 | ↑     |
| Depospho-CoA                 | 32496675.62 | 8220822.17  | 0.004329004 | 1.369725967 | ↑     |

Table S4 The metabolites significantly up-or down-regulated in VAL vs TAA (mean)

| Name                             | VAL         | TAA         | P. value    | VIP         | Trend |
|----------------------------------|-------------|-------------|-------------|-------------|-------|
| Triethylamine                    | 8670283.75  | 21484548.63 | 0.002164502 | 1.729542949 | ↓     |
| Dimethylglycine                  | 94045708.71 | 69569613.33 | 0.004329004 | 1.537230692 | ↑     |
| gamma-Aminobutyric acid          | 22801784.54 | 6635177.77  | 0.004329004 | 1.398174076 | ↑     |
| Benzaldehyde                     | 78133569.51 | 43846690.03 | 0.002164502 | 1.723977919 | ↑     |
| Hydroquinone                     | 23068969.57 | 80730813.33 | 0.015151515 | 1.56799616  | ↓     |
| Cytosine                         | 66146006.22 | 28127053.17 | 0.041125541 | 1.326527358 | ↑     |
| Betaine                          | 188752240.4 | 370952953.8 | 0.004329004 | 1.370689036 | ↓     |
| 2-Methylserine                   | 26794183.39 | 57427425.89 | 0.002164502 | 1.45237958  | ↓     |
| L-2,4-diaminobutyric acid        | 5383753.59  | 4054014.43  | 0.015151515 | 1.414273089 | ↑     |
| Styrene Oxide                    | 15337357.44 | 46595937.19 | 0.025974026 | 1.39550594  | ↓     |
| 4-Hydroxybenzaldehyde            | 54868445.14 | 38626449.35 | 0.041125541 | 1.101395754 | ↑     |
| gamma-Amino-gamma-cyanobutanoate | 29870600.17 | 73807618.61 | 0.041125541 | 1.271529286 | ↓     |
| Pipecolic acid                   | 402065342.5 | 1803344524  | 0.004329004 | 1.429608964 | ↓     |
| 5-Amino-2-oxopentanoic acid      | 34173878.89 | 88038538.19 | 0.002164502 | 1.521410282 | ↓     |
| L-Isoleucine                     | 10486968125 | 7671320348  | 0.002164502 | 1.668110117 | ↑     |
| L-Leucine                        | 24677980.7  | 28559827.38 | 0.025974026 | 1.240932757 | ↓     |

| Name                                   | VAL         | TAA         | P. value    | VIP         | Trend |
|----------------------------------------|-------------|-------------|-------------|-------------|-------|
| 1-<br>Hydroxymethylnaphthalene         | 18361420.56 | 202709506.1 | 0.002164502 | 1.47079269  | ↓     |
| Phosphonoacetate                       | 44127881.63 | 70187689.44 | 0.041125541 | 1.215621944 | ↓     |
| 8-Hydroxyquinoline                     | 126792224.6 | 311717432.3 | 0.008658009 | 1.281067444 | ↓     |
| L-2-Hydroxyglutaric acid               | 25584062.6  | 12212918.75 | 0.002164502 | 1.442314449 | ↑     |
| Tryptamine                             | 6426959.52  | 1329248.08  | 0.002164502 | 1.701097147 | ↑     |
| S-Carboxymethyl-L-<br>cysteine         | 12830209.36 | 26401152.51 | 0.008658009 | 1.459154135 | ↓     |
| L-Carnitine                            | 3648831845  | 6528207137  | 0.025974026 | 1.231362498 | ↓     |
| 3,4-<br>Dihydroxyphenylpropanoate      | 613186560.1 | 1082424522  | 0.008658009 | 1.493379551 | ↓     |
| L-beta-Phenylalanine                   | 53496132.36 | 35363988.25 | 0.025974026 | 1.229502851 | ↑     |
| D-synephrine                           | 131122860   | 90645817.56 | 0.002164502 | 1.706692348 | ↑     |
| Pyridoxamine                           | 6926151.32  | 3675876.19  | 0.041125541 | 1.000349439 | ↑     |
| (S)-4-Hydroxymandelate                 | 22124441.3  | 88325917.71 | 0.025974026 | 1.425529125 | ↓     |
| Tetrahydrodipicolinate                 | 132098495.6 | 66572186.73 | 0.004329004 | 1.489251373 | ↑     |
| Gabapentin                             | 62672978.49 | 180048386.8 | 0.015151515 | 1.490747292 | ↓     |
| Iminoarginine                          | 126170620.8 | 34030769.36 | 0.002164502 | 1.565467885 | ↑     |
| (2S,5S)-trans-<br>Carboxymethylproline | 99765636.82 | 15626952.18 | 0.025974026 | 1.367330507 | ↑     |
| Deisopropylatrazine                    | 5587215.57  | 598403.97   | 0.041125541 | 1.262602628 | ↑     |
| Formiminoglutamic acid                 | 76766909.17 | 43078813.55 | 0.008658009 | 1.348714649 | ↑     |
| Canavanine                             | 90542624.51 | 7163817.87  | 0.002164502 | 1.656961531 | ↑     |
| N-Formyl-L-methionine                  | 88982948.27 | 28682869.2  | 0.025974026 | 1.061245043 | ↑     |
| Cysteinylglycine                       | 19422965.92 | 7368951.88  | 0.004329004 | 1.329278624 | ↑     |

| Name                                | VAL         | TAA         | P. value    | VIP         | Trend |
|-------------------------------------|-------------|-------------|-------------|-------------|-------|
| Methyleugenol                       | 48108559.48 | 168342569.2 | 0.004329004 | 1.430902641 | ↓     |
| (S)-beta-Tyrosine                   | 10483729541 | 1847322815  | 0.004329004 | 1.481559253 | ↑     |
| Sorbitol                            | 256072524.2 | 53243418.24 | 0.004329004 | 1.35800101  | ↑     |
| Epinephrine                         | 4454423.47  | 3004888.48  | 0.025974026 | 1.318516812 | ↑     |
| Phosphorylcholine                   | 679683811.5 | 4248831523  | 0.002164502 | 1.64203297  | ↓     |
| N1-Acetylspermidine                 | 40167759.45 | 16846746.01 | 0.015151515 | 1.28805176  | ↑     |
| Homocitrulline                      | 79728290.61 | 10785566.71 | 0.002164502 | 1.392650273 | ↑     |
| 3-Carbamoyl-2-phenylpropionaldehyde | 60361091.75 | 2250035.5   | 0.002164502 | 1.708613557 | ↑     |
| 3-Methyl-L-tyrosine                 | 612616344.4 | 205909332.2 | 0.025974026 | 1.158033879 | ↑     |
| N5-(L-1-Carboxyethyl)-L-ornithine   | 25408087.32 | 14424407.08 | 0.002164502 | 1.489057253 | ↑     |
| Propionylcarnitine                  | 82183298.07 | 19067853.14 | 0.002164502 | 1.56557485  | ↑     |
| gamma-Glutamylalanine               | 18288333.22 | 37368304.67 | 0.002164502 | 1.22580805  | ↓     |
| Capsidiol                           | 5357918.45  | 1851895.36  | 0.004329004 | 1.649108489 | ↑     |
| 2-trans,6-trans-Farnesal            | 17709660.49 | 4913982.24  | 0.002164502 | 1.573467875 | ↑     |
| Hydroxykynurenine                   | 4661451.44  | 6811506.52  | 0.002164502 | 1.629572017 | ↓     |
| N1-Acetylspermine                   | 10458411.15 | 5790597.28  | 0.002164502 | 1.501179017 | ↑     |
| Illudin M                           | 26124198.95 | 6829636.26  | 0.041125541 | 1.110584249 | ↑     |
| Lumichrome                          | 555164072.8 | 346809934.2 | 0.015151515 | 1.33168047  | ↑     |
| Biotin                              | 3656934.36  | 8308373.22  | 0.002164502 | 1.233470827 | ↓     |
| gamma-Glutamylcysteine              | 5040110.53  | 10391655.72 | 0.002164502 | 1.29977491  | ↓     |
| Muramic acid                        | 1102071788  | 516798227.6 | 0.041125541 | 1.166128307 | ↑     |
| Daidzein                            | 6728042.21  | 1643166.41  | 0.002164502 | 1.668885149 | ↑     |
| Linatine                            | 10616851.33 | 19389719.02 | 0.002164502 | 1.316636911 | ↓     |

| Name                                              | VAL         | TAA         | P. value    | VIP         | Trend |
|---------------------------------------------------|-------------|-------------|-------------|-------------|-------|
| Mannitol 1-phosphate                              | 96122298.99 | 27488537.68 | 0.002164502 | 1.679886774 | ↑     |
| Subaphylline                                      | 7436368     | 1660033.64  | 0.004329004 | 1.550786148 | ↑     |
| Retinol                                           | 145660059   | 234412737.6 | 0.004329004 | 1.363953918 | ↓     |
| (2R,3R)-3-Methylglutamyl-5-semialdehyde-N6-lysine | 8011762.85  | 2111893.98  | 0.002164502 | 1.621014174 | ↑     |
| (2R,3R)-3-Methylornithinyl-N6-lysine              | 13001607.61 | 4650419.89  | 0.008658009 | 1.354225103 | ↑     |
| Saccharopine                                      | 36562288.72 | 66819289.69 | 0.015151515 | 1.187069027 | ↓     |
| Stearidonic acid                                  | 11696372.18 | 5295326.56  | 0.002164502 | 1.463595214 | ↑     |
| 1-(3,4-Dihydroxyphenyl)-5-hydroxy-3-decanone      | 19574151.67 | 7111497.65  | 0.002164502 | 1.594686032 | ↑     |
| Oleic acid                                        | 1231925848  | 626596805.3 | 0.015151515 | 1.323666834 | ↑     |
| Stearic acid                                      | 5035331.34  | 5823152.72  | 0.041125541 | 1.193910537 | ↓     |
| Glycitein                                         | 7904661.92  | 426116.82   | 0.002164502 | 1.791941049 | ↑     |
| Retinal                                           | 37256497.41 | 7815250.17  | 0.002164502 | 1.621948479 | ↑     |
| Sumatriptan                                       | 758155.09   | 17890386.47 | 0.002164502 | 1.81574701  | ↓     |
| Metoclopramide                                    | 12091013.8  | 8317267.49  | 0.015151515 | 1.130322632 | ↑     |
| 19(S)-HETE                                        | 137686977.8 | 34623934.42 | 0.002164502 | 1.627736174 | ↑     |
| N(6)-[(Indol-3-yl)acetyl]-L-lysine                | 52115302.4  | 22743937.68 | 0.004329004 | 1.53601378  | ↑     |
| 4'-Oxonebramine                                   | 29486794.88 | 13717152.73 | 0.002164502 | 1.555485604 | ↑     |
| Aflatoxin B1                                      | 28622492.05 | 626688.27   | 0.002164502 | 1.717242952 | ↑     |
| Prostaglandin D2                                  | 1555067.23  | 12721827.44 | 0.025974026 | 1.166408314 | ↓     |
| 15(S)-HPETE                                       | 1204802.72  | 4161826.95  | 0.002164502 | 1.541694327 | ↓     |
| Prostaglandin E1                                  | 10432291.89 | 4922620.77  | 0.041125541 | 1.058954211 | ↑     |



| Name                                            | VAL         | TAA         | P. value    | VIP         | Trend |
|-------------------------------------------------|-------------|-------------|-------------|-------------|-------|
| L-Alanyl-gamma-D-glutamyl-L-lysine              | 3446311.69  | 1678405.09  | 0.002164502 | 1.514461237 | ↑     |
| 21-Deoxycortisol                                | 29878505.5  | 18568445.01 | 0.008658009 | 1.20222112  | ↑     |
| 2-Hydroxy-6-pentadecylbenzoic acid              | 138609684.6 | 40259364.47 | 0.002164502 | 1.70787549  | ↑     |
| Prostaglandin G2                                | 34537846.3  | 4595308.3   | 0.041125541 | 1.131457938 | ↑     |
| (13E)-11a-Hydroxy-9,15-dioxoprost-13-enoic acid | 35182843.97 | 4991254.49  | 0.002164502 | 1.593304869 | ↑     |
| 8-Isoprostane                                   | 13605765.87 | 7909989.26  | 0.025974026 | 1.19738224  | ↑     |
| Nitrendipine                                    | 104478109.9 | 29747233.65 | 0.002164502 | 1.517797075 | ↑     |
| Chelirubine                                     | 1610915.59  | 32600532.77 | 0.015151515 | 1.432368316 | ↓     |
| Cortisol                                        | 36301375.56 | 7422790.34  | 0.002164502 | 1.818609492 | ↑     |
| GMP                                             | 100937203.4 | 32146455.64 | 0.002164502 | 1.59176501  | ↑     |
| Isolithocholic acid                             | 352280049   | 69395722.18 | 0.002164502 | 1.437278058 | ↑     |
| Riboflavin reduced                              | 18131057.85 | 6245619.81  | 0.004329004 | 1.294786511 | ↑     |
| Risperidone                                     | 126759932.7 | 1556498.77  | 0.002164502 | 1.805762305 | ↑     |
| 5alpha-Ergosta-7,22-diene-3beta,5-diol          | 35569323.54 | 12900523.09 | 0.004329004 | 1.3888214   | ↑     |
| Glutathionylspermidine                          | 8822917.98  | 292596.01   | 0.002164502 | 1.735809886 | ↑     |
| S-Glutathionyl-L-cysteine                       | 35184492.38 | 77975485.23 | 0.004329004 | 1.624303463 | ↓     |
| alpha-Tocopherol                                | 59314743.47 | 28959996.05 | 0.015151515 | 1.430610162 | ↑     |
| Hecogenin                                       | 13442254.15 | 1532053.23  | 0.025974026 | 1.230878229 | ↑     |
| Gentamicin C1a                                  | 8841626.53  | 18220474.28 | 0.025974026 | 1.222218685 | ↓     |
| Isovitexin                                      | 393592424.4 | 133822832.5 | 0.002164502 | 1.314609588 | ↑     |
| 3-Dehydroecdysone                               | 84576318.42 | 207169699.3 | 0.015151515 | 1.055199412 | ↓     |

| Name                        | VAL         | TAA         | P. value    | VIP         | Trend |
|-----------------------------|-------------|-------------|-------------|-------------|-------|
| 3-Epiecdysone               | 211585591.8 | 24519160.13 | 0.025974026 | 1.13099153  | ↑     |
| 26-Hydroxyecdysone          | 752040552.8 | 111806528   | 0.004329004 | 1.533273267 | ↑     |
| Taurochenodesoxycholic acid | 814244290.2 | 69441000.58 | 0.002164502 | 1.65956488  | ↑     |
| Antibiotic JI-20A           | 3380764800  | 1592274596  | 0.004329004 | 1.383512143 | ↑     |
| Deltaline                   | 23161812.24 | 12874446.19 | 0.041125541 | 1.322302882 | ↑     |
| Protoporphyrinogen IX       | 10860629.5  | 23727536.83 | 0.025974026 | 1.245216076 | ↓     |
| Avermectin A2b aglycone     | 27342206.9  | 7802215.52  | 0.015151515 | 1.339426993 | ↑     |
| L-Serine                    | 423964738.6 | 103920061.9 | 0.004329004 | 1.515617764 | ↑     |
| D-Proline                   | 7734009.78  | 5649147.97  | 0.002164502 | 1.639185965 | ↑     |
| Threonate                   | 8580531.59  | 2875861.87  | 0.004329004 | 1.420949749 | ↑     |
| Pyroglutamic acid           | 34514587.32 | 8319304.64  | 0.008658009 | 1.324557302 | ↑     |
| Ketoleucine                 | 30623911.06 | 12703654.88 | 0.008658009 | 1.424852537 | ↑     |
| Salicylic acid              | 3874554.77  | 529427.88   | 0.041125541 | 1.275040074 | ↑     |
| O-Phosphoethanolamine       | 13068305.86 | 37091295.41 | 0.004329004 | 1.239488127 | ↓     |
| (S)-5-Amino-3-oxohexanoate  | 24308006.46 | 15291137.47 | 0.041125541 | 1.137963448 | ↑     |
| 1H-Indole-3-carboxaldehyde  | 23864911.9  | 66276494.79 | 0.002164502 | 1.592422776 | ↓     |
| L-Xylonate                  | 95415069.65 | 34249990.91 | 0.008658009 | 1.424847614 | ↑     |
| D-Xylose                    | 2802505.87  | 12316271.4  | 0.008658009 | 1.398685525 | ↓     |
| D-Glucose                   | 6006243.98  | 22748569.36 | 0.004329004 | 1.528815643 | ↓     |
| myo-Inositol                | 4671453.26  | 18938150.63 | 0.002164502 | 1.594265746 | ↓     |
| D-Galactose                 | 5554945.41  | 13163309.18 | 0.008658009 | 1.368912111 | ↓     |
| 1D-chiro-Inositol           | 22426781.23 | 76863861.83 | 0.041125541 | 1.068764884 | ↓     |

| Name                       | VAL         | TAA         | P. value    | VIP         | Trend |
|----------------------------|-------------|-------------|-------------|-------------|-------|
| Indole-3-carboxylic acid   | 7273537.13  | 16092368.14 | 0.041125541 | 1.152197445 | ↓     |
| 3-Methylxanthine           | 15078342.52 | 26624218.12 | 0.015151515 | 1.082367329 | ↓     |
| Thioguanine                | 289123931.9 | 128123546.4 | 0.004329004 | 1.450927052 | ↑     |
| Homogentisic acid          | 1784440.9   | 1116972.71  | 0.025974026 | 1.243362037 | ↑     |
| Capric acid                | 20131150.26 | 6282503.62  | 0.008658009 | 1.447321263 | ↑     |
| Pyrophosphate              | 1081444838  | 219630241.6 | 0.015151515 | 1.389837885 | ↑     |
| 1-Keto-D-chiro-inositol    | 828166.98   | 3337711.02  | 0.004329004 | 1.497500233 | ↓     |
| D-Mannose                  | 1699353034  | 587155668.6 | 0.004329004 | 1.142807787 | ↑     |
| L-Tyrosine                 | 495541687.6 | 291167855.1 | 0.002164502 | 1.377182716 | ↑     |
| Hydroxyphenyllactic acid   | 11019523.16 | 17777903.1  | 0.004329004 | 1.375033136 | ↓     |
| N6-Acetyl-L-lysine         | 38207280.76 | 14798914.17 | 0.002164502 | 1.652064679 | ↑     |
| 10-Hydroxydecanoic acid    | 3452723.79  | 1297562.74  | 0.041125541 | 1.202416437 | ↑     |
| Azelaic acid               | 28255967.23 | 8591416.41  | 0.002164502 | 1.678718905 | ↑     |
| Kynurenic acid             | 9607119.41  | 4383517.26  | 0.002164502 | 1.52871691  | ↑     |
| N-Acetylglutamic acid      | 405669751   | 1354539885  | 0.004329004 | 1.580203298 | ↓     |
| 5-Hydroxyindoleacetic acid | 22211790.39 | 67523145.97 | 0.002164502 | 1.64006908  | ↓     |
| Gluconic acid              | 2354950938  | 772081751.4 | 0.002164502 | 1.658255958 | ↑     |
| Galactaric acid            | 19638746.14 | 52759081.08 | 0.015151515 | 1.372259093 | ↓     |
| D-Ribulose 5-phosphate     | 251579.65   | 603299.06   | 0.041125541 | 1.231123139 | ↓     |
| 12-Hydroxydodecanoic acid  | 11151208.9  | 4533846.52  | 0.004329004 | 1.499212805 | ↑     |
| N-Acetyl-D-glucosamine     | 42777505.04 | 10727220.18 | 0.002164502 | 1.531923805 | ↑     |
| Biopterin                  | 1455349.55  | 5236161.11  | 0.025974026 | 1.084805431 | ↓     |
| 1-Hexadecanol              | 1504048.17  | 7879784.54  | 0.002164502 | 1.822984509 | ↓     |
| Pseudouridine              | 1669870.71  | 2866252.05  | 0.002164502 | 1.470770422 | ↓     |
| Gemfibrozil                | 4033366.87  | 2728424.31  | 0.025974026 | 1.165972942 | ↑     |

| Name                          | VAL         | TAA         | P. value    | VIP         | Trend |
|-------------------------------|-------------|-------------|-------------|-------------|-------|
| (S)-Pinocembrin               | 3375149.68  | 262265.92   | 0.002164502 | 1.584372446 | ↑     |
| Genistein                     | 2251725.64  | 8319631.39  | 0.002164502 | 1.457952874 | ↓     |
| 17a-Estradiol                 | 283910038.8 | 781749279.7 | 0.004329004 | 1.503516012 | ↓     |
| Estradiol                     | 16946366.45 | 1698228.73  | 0.002164502 | 1.721983739 | ↑     |
| Hexadecanedioate              | 20134787.01 | 11110239.95 | 0.041125541 | 1.012715938 | ↑     |
| Cinchonidine                  | 16709160.1  | 5213527.34  | 0.002164502 | 1.447698284 | ↑     |
| 5'-S-Methyl-5'-thioinosine    | 1739265.85  | 1082365.32  | 0.008658009 | 1.394024548 | ↑     |
| (-)-Epigallocatechin          | 492839535.1 | 93867490.12 | 0.002164502 | 1.409456168 | ↑     |
| 9(S)-HPODE                    | 6487275     | 13888812.46 | 0.041125541 | 1.122707986 | ↓     |
| 11-Dehydrocorticosterone      | 163901921.7 | 30721449.31 | 0.002164502 | 1.568207112 | ↑     |
| Aspartylglycosamine           | 65078582.5  | 34920152.17 | 0.025974026 | 1.258160141 | ↑     |
| 8,9-DiHETrE                   | 26768049.13 | 54317663.16 | 0.015151515 | 1.30876002  | ↓     |
| Erucic acid                   | 13687793.79 | 29308264.22 | 0.041125541 | 1.261326055 | ↓     |
| Esculin                       | 1571868.38  | 4537467.08  | 0.008658009 | 1.407902132 | ↓     |
| 3'-AMP                        | 14662698.53 | 37376774.01 | 0.015151515 | 1.121923299 | ↓     |
| S-(2-Hydroxyethyl)glutathione | 33531211.99 | 5973437.36  | 0.025974026 | 1.230944075 | ↑     |
| Xanthohumol                   | 1969081.72  | 245552.98   | 0.002164502 | 1.55823159  | ↑     |
| Rosmarinic acid               | 33728548.97 | 1461237.75  | 0.002164502 | 1.522981624 | ↑     |
| Deoxycorticosterone acetate   | 21426811.84 | 7952640.87  | 0.002164502 | 1.63101027  | ↑     |
| N-Acetyllactosamine           | 3390177.23  | 1058964.34  | 0.002164502 | 1.316857439 | ↑     |
| Mitragynine                   | 20574538.04 | 10134384.22 | 0.041125541 | 1.229017244 | ↑     |
| 25-Hydroxycholesterol         | 4660900.04  | 7810105.04  | 0.008658009 | 1.335927227 | ↓     |
| Allocholic acid               | 117605534.3 | 31656556.92 | 0.004329004 | 1.555309592 | ↑     |
| LysoPA(16_0_0_0)              | 28735695.61 | 11380029.42 | 0.004329004 | 1.432262723 | ↑     |

| <b>Name</b>                  | <b>VAL</b>  | <b>TAA</b>  | <b>P. value</b> | <b>VIP</b>  | <b>Trend</b> |
|------------------------------|-------------|-------------|-----------------|-------------|--------------|
| Trehalose 6-phosphate        | 487757929.4 | 127049598.9 | 0.004329004     | 1.445227317 | ↑            |
| Phosphonoformyl-CMP          | 1311207.7   | 10331981.04 | 0.015151515     | 1.485031631 | ↓            |
| Folic acid                   | 3436425.13  | 9516408.09  | 0.002164502     | 1.037226194 | ↓            |
| CDP-Ethanolamine             | 1994788.21  | 5958358.75  | 0.004329004     | 1.414725468 | ↓            |
| Perfluorooctanesulfonic acid | 12134353.66 | 4914666.82  | 0.015151515     | 1.478890255 | ↑            |
| Telmisartan                  | 747673.4    | 132228.39   | 0.004329004     | 1.361965878 | ↑            |
| Leukotriene C4               | 884172.46   | 245586.35   | 0.015151515     | 1.365176891 | ↑            |
| NAD                          | 9556997.65  | 42217108.25 | 0.015151515     | 1.196052652 | ↓            |
| Dephospho-CoA                | 56300843.38 | 8220822.17  | 0.004329004     | 1.51547609  | ↑            |
